# Supplementary material for: RNA Sequencing Analysis Reveals Transcriptomic Variations in Tobacco (Nicotiana tabacum) Leaves Affected by Climate, Soil, and Tillage Factors
Source: MDPI journal article supplement (doi:10.3390/ijms15046137), 2014-04-11

# Supplementary Information

**Figure S1.** Box plot analysis of 10 RNA-seq samples. FPKM, fragments per kilobase of transcript per million fragments mapped.

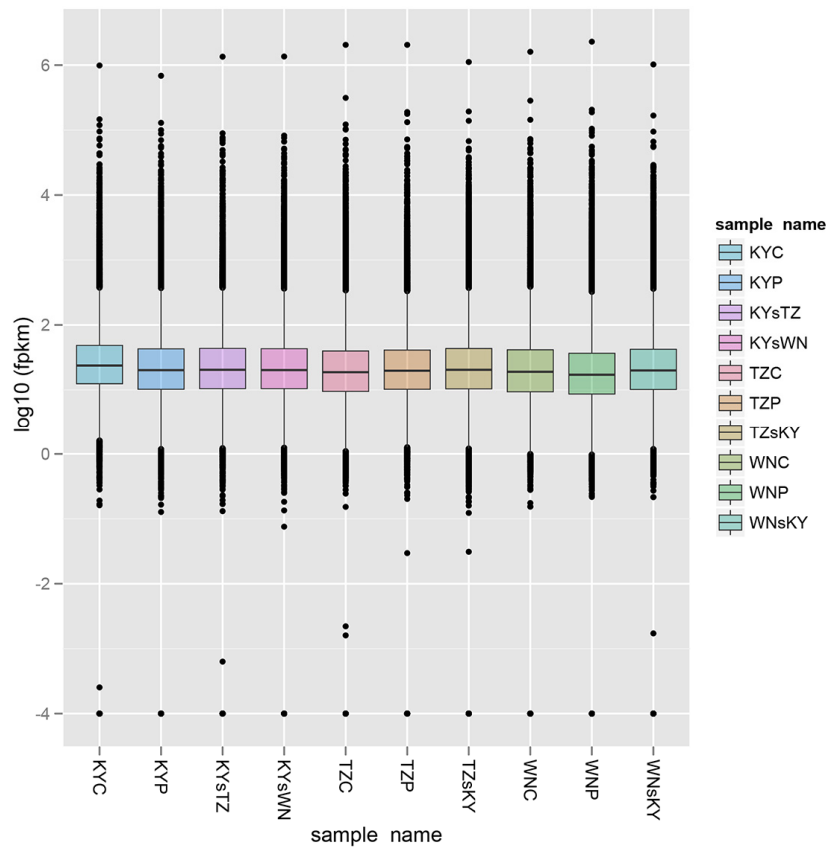

**Figure S2.** Gene expression level distribution of 10 RNA-seq samples.

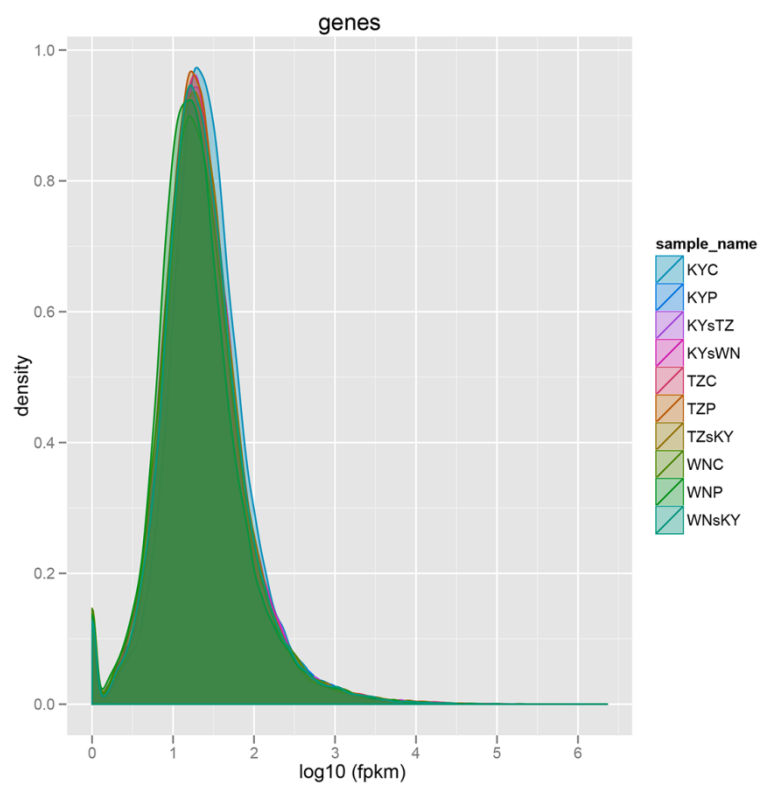

**Figure S3.** Volcano plot of DEGs between the 10 RNA-seq samples.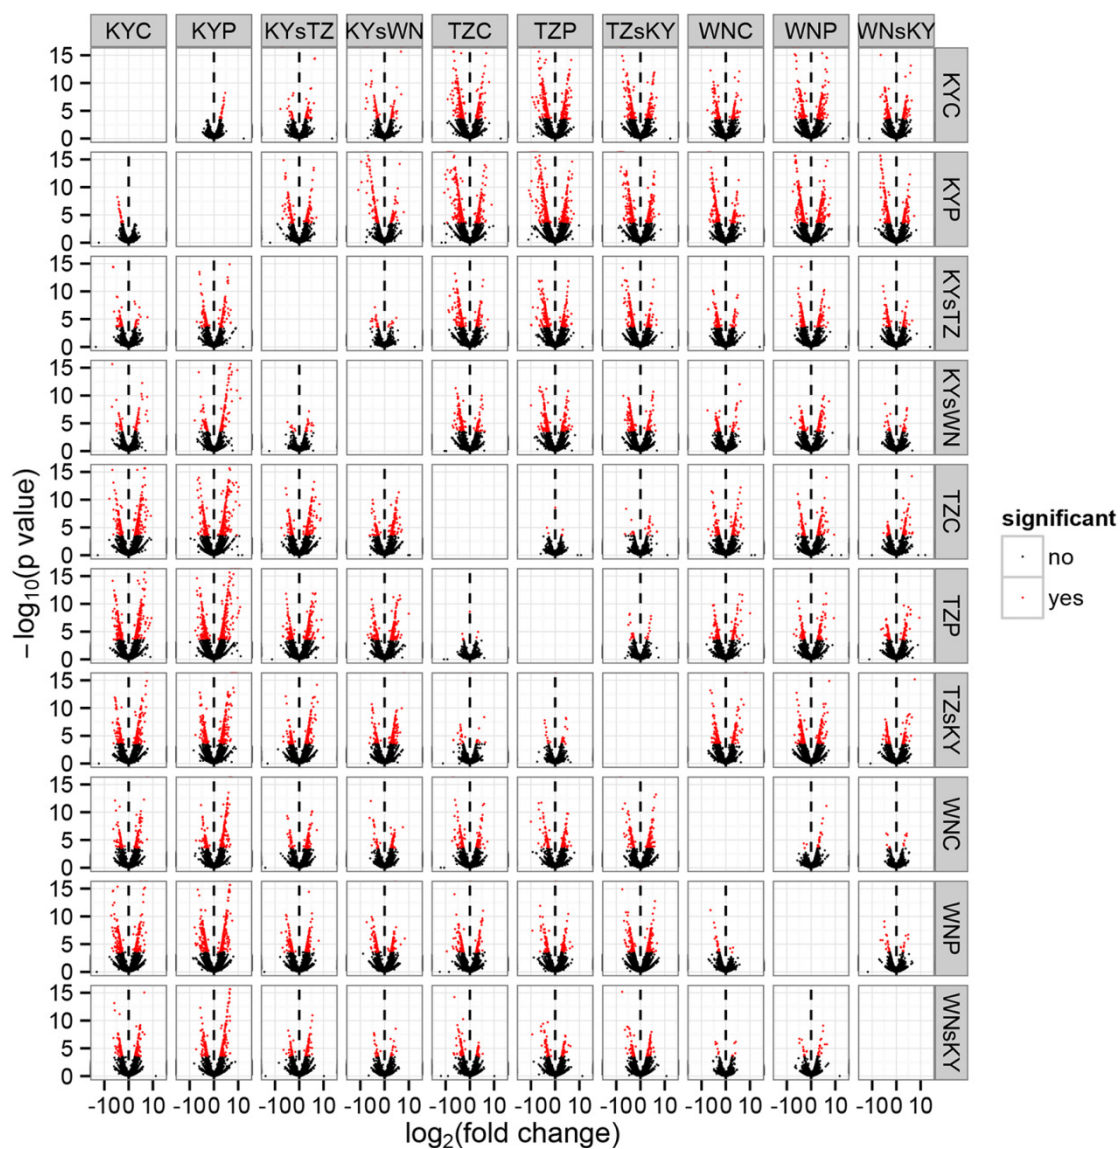

Supplement: s1 [file s1]
