# Supplementary material for: RNA Sequencing Analysis Reveals Transcriptomic Variations in Tobacco (Nicotiana tabacum) Leaves Affected by Climate, Soil, and Tillage Factors
Source: MDPI journal article supplement (doi:10.3390/ijms15046137), 2014-04-11
Supplement: s1 [file s1]

# Supplementary Information

**Table S2.** Correlation Matrix in PCA analysis.

| Sample |       | Correlation coefficient |       |       |       |       |       |       |       |       |
|--------|-------|-------------------------|-------|-------|-------|-------|-------|-------|-------|-------|
| WNC    | 1     | 0.88                    | 0.884 | 0.799 | 0.794 | 0.783 | 0.791 | 0.804 | 0.785 | 0.837 |
| WNP    | 0.88  | 1                       | 0.876 | 0.804 | 0.809 | 0.771 | 0.758 | 0.787 | 0.745 | 0.811 |
| WNsKY  | 0.884 | 0.876                   | 1     | 0.823 | 0.815 | 0.812 | 0.814 | 0.821 | 0.797 | 0.855 |
| TZC    | 0.799 | 0.804                   | 0.823 | 1     | 0.893 | 0.883 | 0.746 | 0.78  | 0.719 | 0.804 |
| TZP    | 0.794 | 0.809                   | 0.815 | 0.893 | 1     | 0.884 | 0.733 | 0.759 | 0.704 | 0.779 |
| TZsKY  | 0.783 | 0.771                   | 0.812 | 0.883 | 0.884 | 1     | 0.771 | 0.786 | 0.746 | 0.799 |
| KYC    | 0.791 | 0.758                   | 0.814 | 0.746 | 0.733 | 0.771 | 1     | 0.85  | 0.889 | 0.863 |
| KYsTZ  | 0.804 | 0.787                   | 0.821 | 0.78  | 0.759 | 0.786 | 0.85  | 1     | 0.827 | 0.891 |
| KYP    | 0.785 | 0.745                   | 0.797 | 0.719 | 0.704 | 0.746 | 0.889 | 0.827 | 1     | 0.84  |
| KYsWN  | 0.837 | 0.811                   | 0.855 | 0.804 | 0.779 | 0.799 | 0.863 | 0.891 | 0.84  | 1     |

**Table S6.** Main meteorological data at different growth stages at three cultivated regions.

| Climate factor                      | Earlier growing stage |        |       | Maturing stage |        |        |
|-------------------------------------|-----------------------|--------|-------|----------------|--------|--------|
|                                     | KY                    | TZ     | WN    | KY             | TZ     | WN     |
| Daily mean temperature (°C)         | 19. 1                 | 23. 6  | 15. 9 | 21.7           | 26. 2  | 16. 5  |
| ≥10 °C accumulated temperature (°C) | 1162.3                | 1156.7 | 941.6 | 1379.8         | 1687.4 | 1289.9 |
| The amount of sunlight hours (h)    | 219.7                 | 176.6  | 270.2 | 358.1          | 363.4  | 261.3  |
| Cumulative rainfall (mm)            | 395.4                 | 338.7  | 329.6 | 282.8          | 291.5  | 379.8  |
| Daily mean relative humidity (%)    | 86. 4                 | 82.7   | 84. 9 | 84. 3          | 83. 6  | 85. 2  |

**Table S7.** Agronomic traits of tobacco plants at 45 and 70 DAT.

| Location | Treatments | 45 DAT            |                     |                  |                                      | 70 DAT            |                     |                  |                                      |
|----------|------------|-------------------|---------------------|------------------|--------------------------------------|-------------------|---------------------|------------------|--------------------------------------|
|          |            | Plant height (cm) | Stem perimeter (cm) | Number of leaves | Maximum leaf area (cm <sup>2</sup> ) | Plant height (cm) | Stem perimeter (cm) | Number of leaves | Maximum leaf area (cm <sup>2</sup> ) |
| WN       | WNC        | 54.7              | 8.3                 | 17.3             | 1166.8                               | 117.5             | 9.8                 | 16.4             | 1547.5                               |
|          | WNP        | 55.5              | 8.7                 | 17.8             | 1138                                 | 122.6             | 10                  | 16.5             | 1511.2                               |
|          | WNsKY      | 53.4              | 8.1                 | 17.2             | 1017.8                               | 114.6             | 9.2                 | 15.7             | 1214.9                               |
| TZ       | TZC        | 58.7              | 6.6                 | 16               | 873.7                                | 97.5              | 8                   | 19               | 1081.8                               |
|          | TZP        | 55                | 6.5                 | 17               | 830.9                                | 97.5              | 8.3                 | 19.5             | 1087.9                               |
|          | TZsKY      | 67.3              | 6.9                 | 17.7             | 913.4                                | 119               | 8.8                 | 20               | 1327.7                               |
| KY       | KYC        | 69.1              | 7.5                 | 16               | 909.9                                | 133.3             | 9.5                 | 22               | 1151.1                               |
|          | KYP        | 81.7              | 8.3                 | 17               | 1245.4                               | 139.6             | 9.7                 | 21               | 1421.3                               |
|          | KYsTZ      | 47.2              | 6.6                 | 14               | 598.6                                | 103.7             | 7.6                 | 20               | 746.8                                |
|          | KYsWN      | 87.9              | 8.5                 | 18               | 1321.1                               | 151.8             | 10                  | 22               | 1481                                 |

**Table S10.** The basic physiochemical property of tested soils.

| Cultivated regions | Avail. N (mg/kg) | Avail. P (mg/kg) | Avail. K (mg/kg ) | Avail. B (mg/kg) | Avail. Cu (mg/kg ) | Avail. Mn (mg/kg) | Avail. Fe (mg/kg) | Avail. S (mg/kg) | pH   | Cation exchange capacity (cmol/kg ) |
|--------------------|------------------|------------------|-------------------|------------------|--------------------|-------------------|-------------------|------------------|------|-------------------------------------|
| KY                 | 183.08           | 36.58            | 148.77            | 0.36             | 1.87               | 76.13             | 22.53             | 97.06            | 6.07 | 28.4                                |
| WN                 | 134.15           | 12.72            | 168.89            | 0.17             | 1.29               | 35.41             | 9.25              | 30.42            | 5.87 | 10.08                               |
| TZ                 | 142.86           | 3.22             | 94.05             | 0.29             | 1.53               | 51.53             | 13.25             | 73.94            | 5.75 | 12.23                               |

**Table S12.** qRT-PCR primers used in this study.

| Gene name         | Forward primer (5'–3') | Reverse primer (5'–3') | Reference gene     |
|-------------------|------------------------|------------------------|--------------------|
| <i>HSP17.4-CI</i> | CCGCCGATCCAGCGTCTTCG   | AGCCCAGGGACGTCAGCCTT   | <i>XLOC_016615</i> |
| <i>HSP70</i>      | GCGATTTCGTGGCTCGACGGT  | TTGCACCAGCAGAAGGGCCA   | <i>XLOC_018396</i> |
| <i>OSM34</i>      | AACACCTTGGCCGAATACGCA  | AGTCGGGGCGAAAGTCATCGG  | <i>XLOC_018354</i> |
| <i>P5CSI</i>      | GGCTTGTGCTGCTGTGGGTC   | AGCTGAGCTGAGGTTACGTCCA | <i>XLOC_022761</i> |
| <i>PsbA</i>       | CCAGGGCAAGGGTTGATGCCT  | CAACAGGTGCTACGCGGCCA   | <i>XLOC_008952</i> |
| <i>SF3A3</i>      | GCATCCTGCTGCGCGTGTG    | CGCCCTGAACCTTCCTCGCC   | <i>XLOC_005963</i> |
| <i>NtEF-1α</i>    | TGAGATGCACCACGAAGCTC   | CCAACATTGTCACCAGGAAGTG | <i>XLOC_014807</i> |
